# Supplementary material
Source: PubMed Central journal article supplement (PMC1483043)

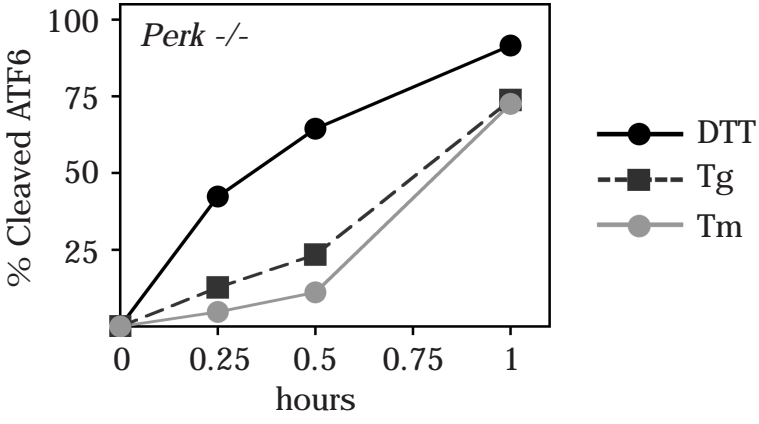

Supplement: mbc_E06-01-0055_1.pdf [file mbc_E06-01-0055_1.pdf]

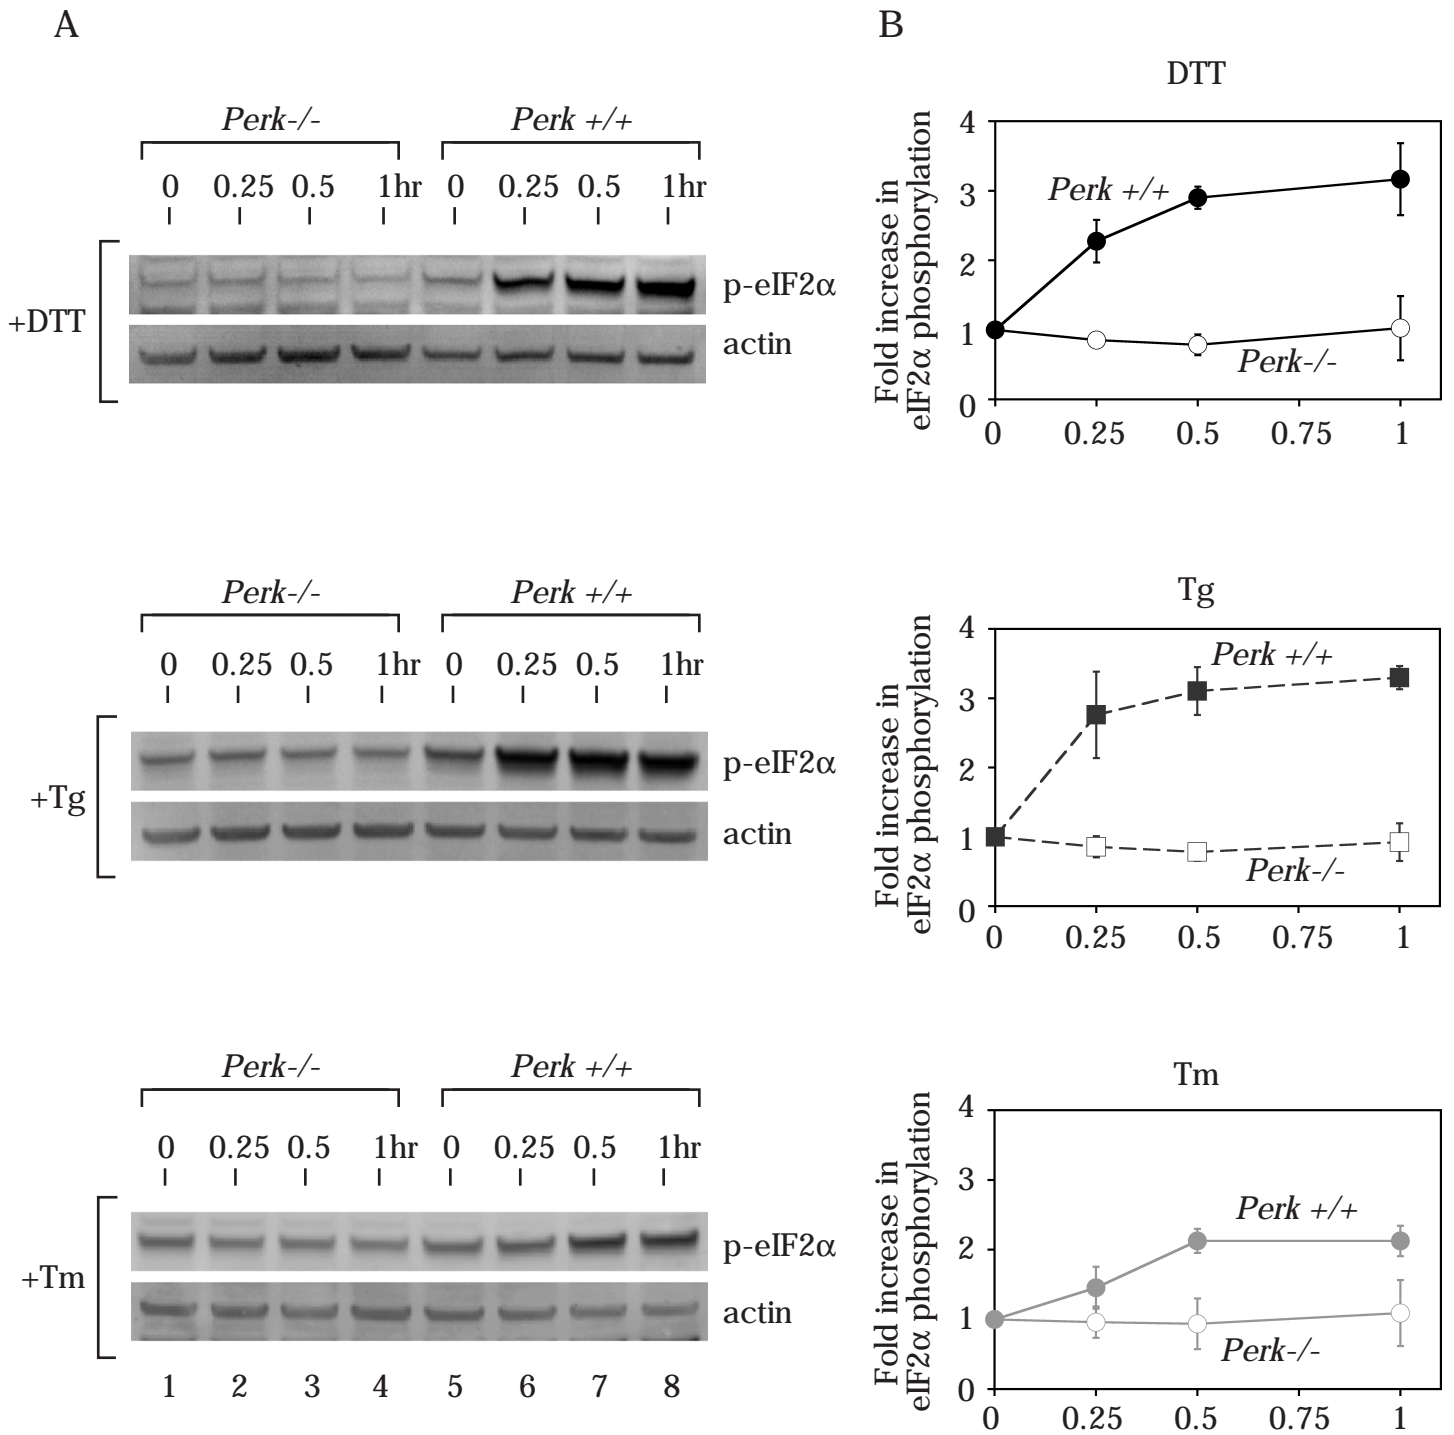

Supplementary Figure 2

Supplement: mbc_E06-01-0055_2.pdf [file mbc_E06-01-0055_2.pdf]

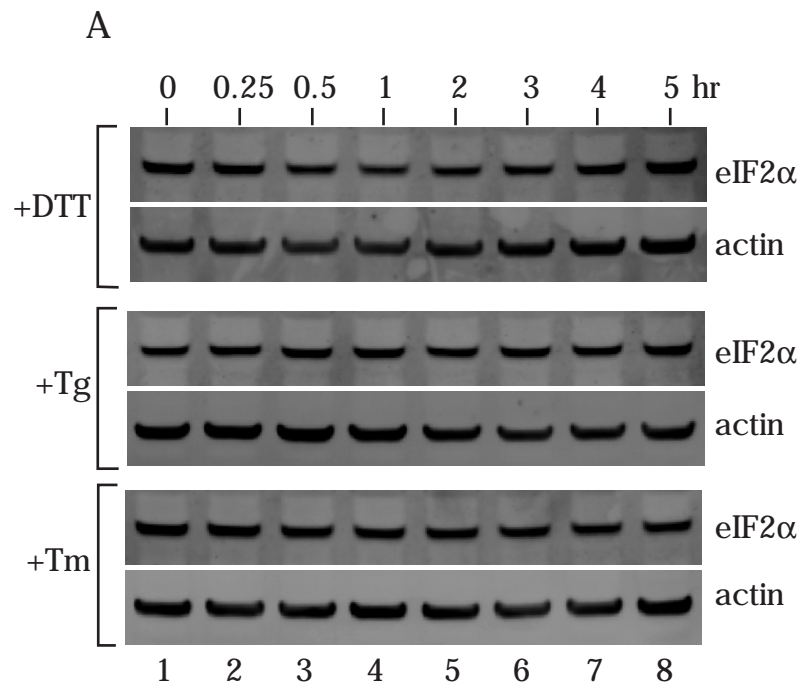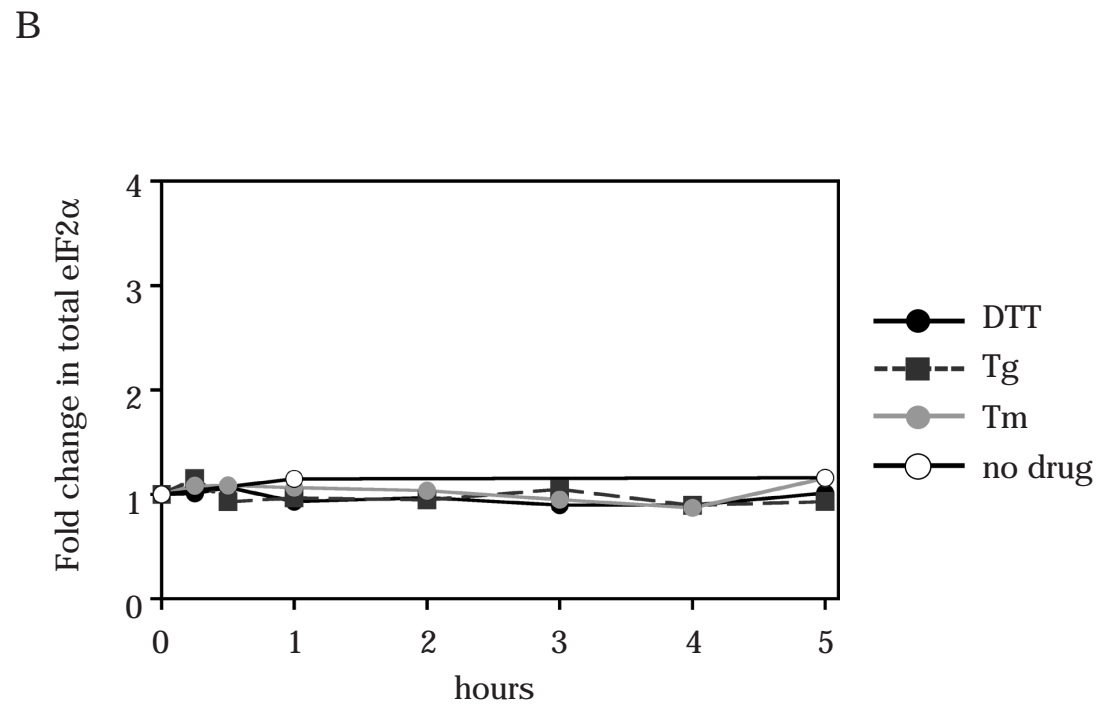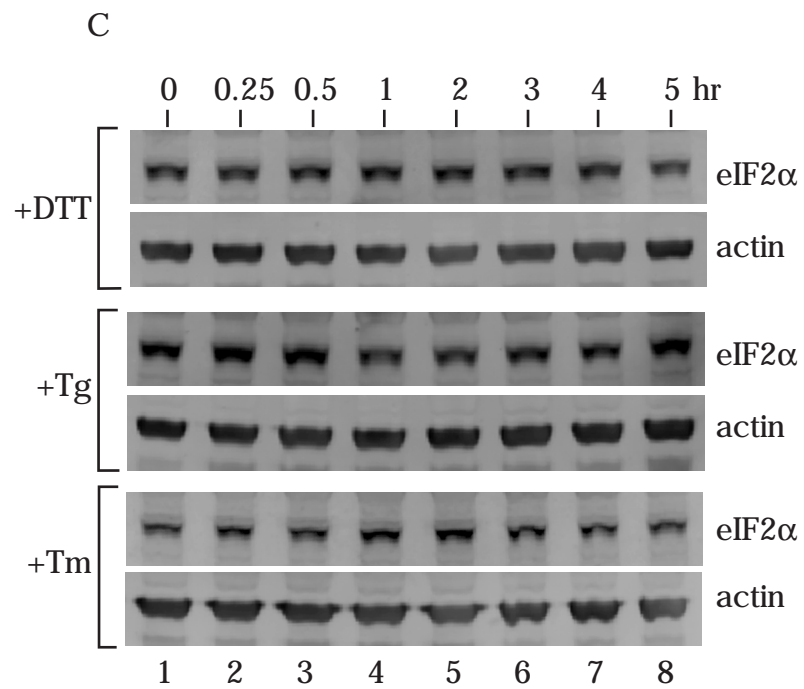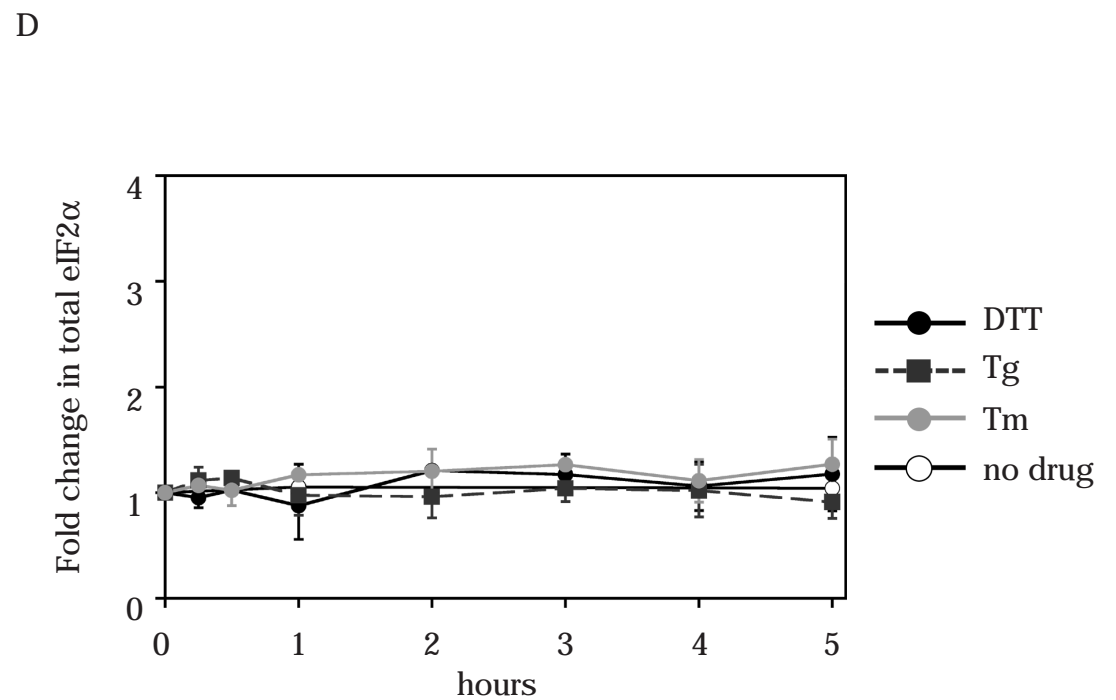

Supplement: mbc_E06-01-0055_3.pdf [file mbc_E06-01-0055_3.pdf]

A

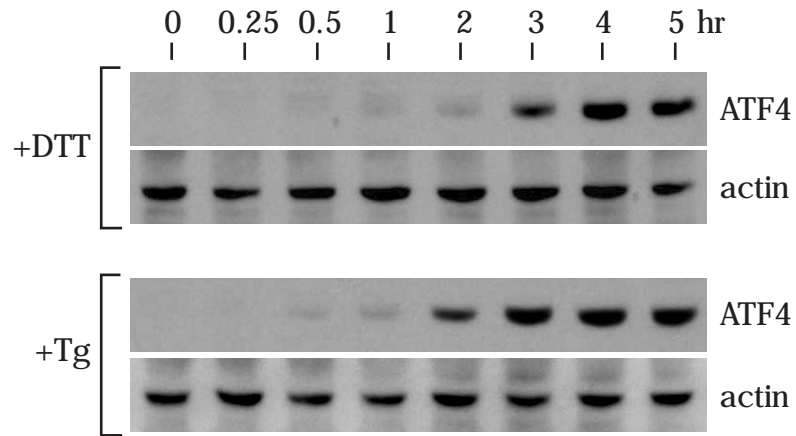

B

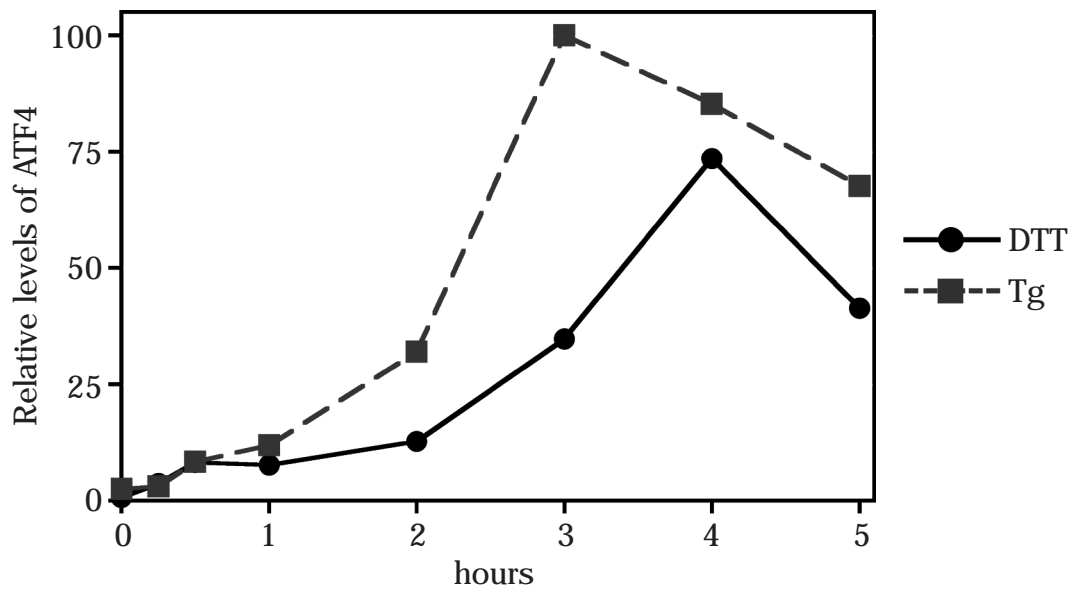

Supplement: mbc_E06-01-0055_4.pdf [file mbc_E06-01-0055_4.pdf]
